# Supplementary material for: High-performance bio-based epoxies from ferulic acid and furfuryl alcohol: synthesis and properties
Source: Royal Society of Chemistry journal article supplement (doi:10.1039/d0gc03946b), 2021-01-01
Supplement: d0gc03946b1.pdf [file d0gc03946b1.pdf]

## Supporting Information

### **High-performance bio-based epoxies from ferulic acid and furfuryl alcohol:**

#### **Synthesis and properties**

Jiale Ye<sup>1,2</sup>, Songqi Ma<sup>\*,2</sup>, Binbo Wang<sup>2</sup>, Qingming Chen<sup>1</sup>, Kaifeng Huang<sup>2</sup>, Xiwei Xu<sup>2</sup>, Qiong Li<sup>2</sup>, Sheng Wang<sup>2</sup>, Na Lu<sup>2</sup>, and Jin Zhu<sup>2</sup>

<sup>1</sup>College of Materials Science and Engineering, Kunming University of Science and Technology, Kunming 650093, China;

<sup>2</sup> Key Laboratory of Bio-based Polymeric Materials Technology and Application of Zhejiang Province, Laboratory of Polymers and Composites, Ningbo Institute of Materials Technology and Engineering, Chinese Academy of Sciences, Ningbo 315201, P. R. China;

\*Corresponding author: (Songqi Ma) E-mail [masongqi@nimte.ac.cn](mailto:masongqi@nimte.ac.cn), Tel 86-574-87619806.

## Contents

|                                                                                                           |   |
|-----------------------------------------------------------------------------------------------------------|---|
| Fig. S1 a) $^1\text{H}$ NMR, b) $^{13}\text{C}$ NMR and c) GC-MS spectra of GEFA. ....                    | 3 |
| Fig. S2 Curing of FAE and DDS. ....                                                                       | 3 |
| Fig. S3 $^1\text{H}$ NMR spectra of a) P-FAE and b) after the reaction between P-FAE and GEFA. ....       | 4 |
| Fig. S4 $^1\text{H}$ NMR spectra of the Diels-Alder adducts at 140 °C for 6 h and at 200 °C for 2 h. .... | 5 |
| Fig. S5 FTIR spectra of the $\text{FAE}_1\text{GEFA}_0$ system before and after curing. ....              | 6 |
| Fig. S6 Storage modulus as a function of temperature for the cured epoxy resins by DMA. ....              | 6 |

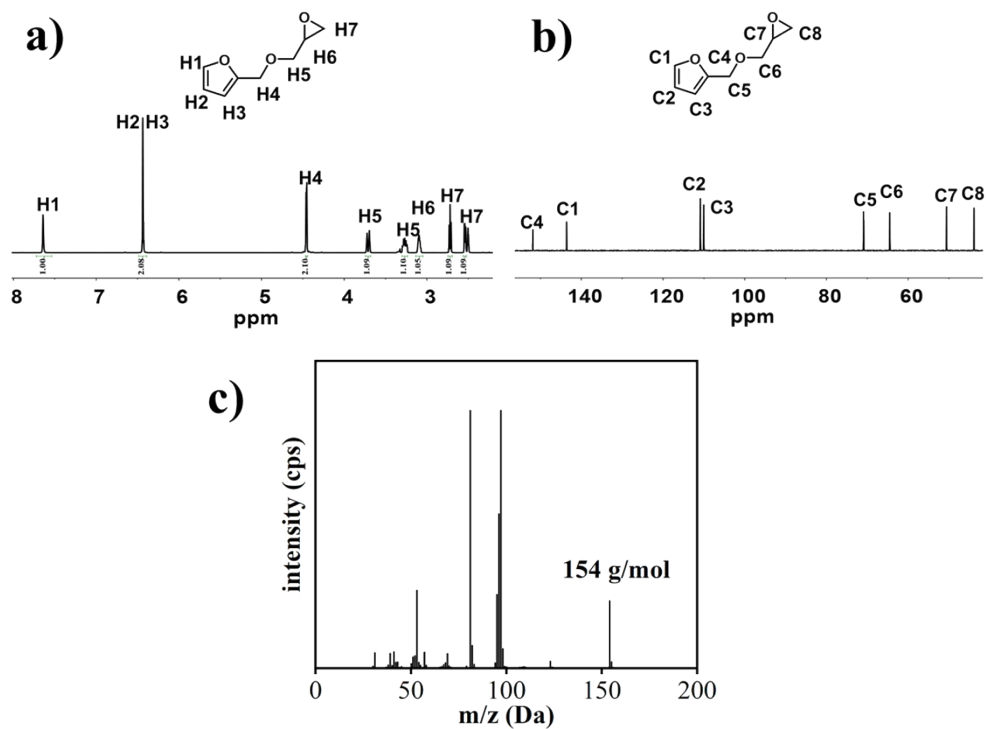

**Fig. S1** a)  $^1\text{H}$  NMR, b)  $^{13}\text{C}$  NMR and c) GC-MS spectra of GEFA.

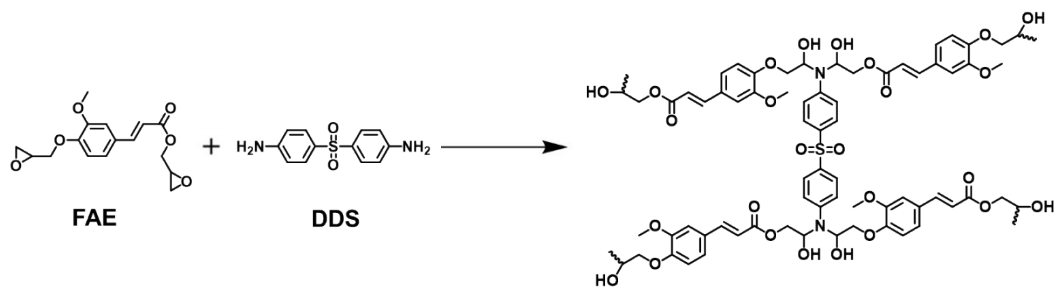

**Fig. S2** Curing of FAE and DDS.

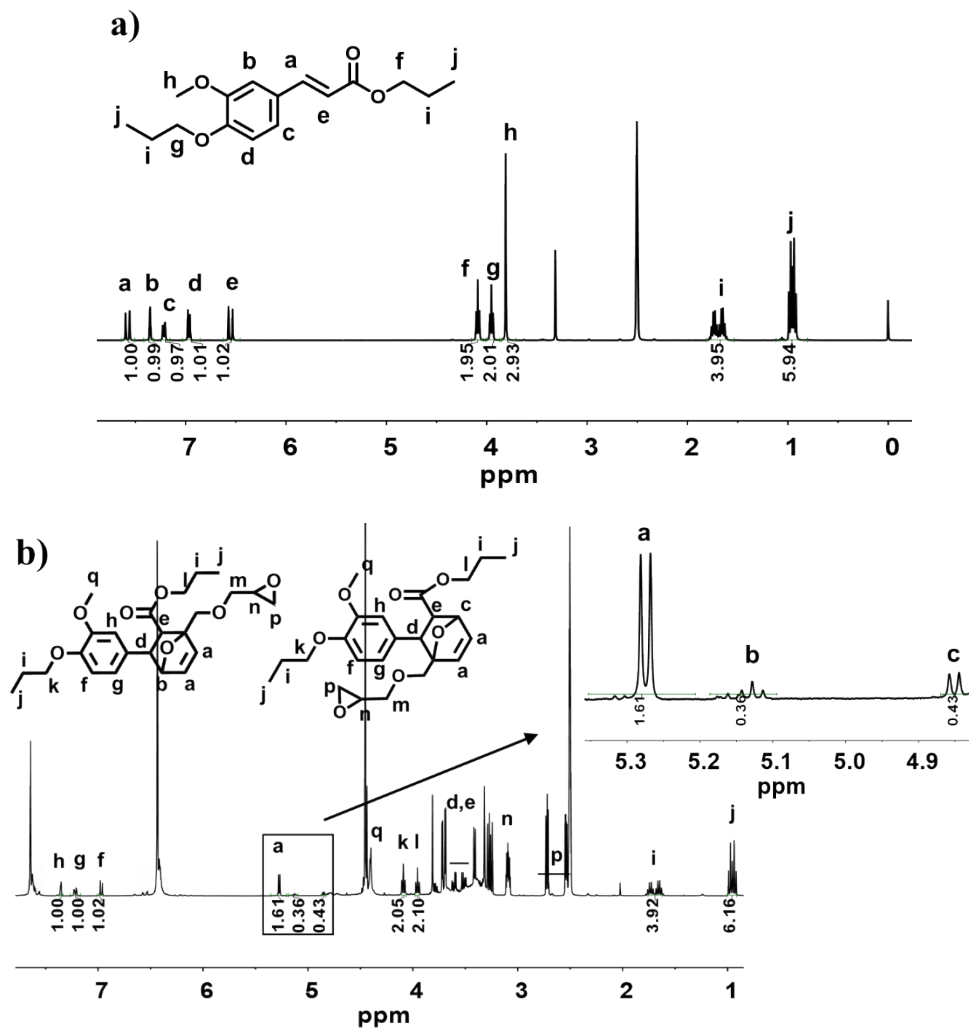

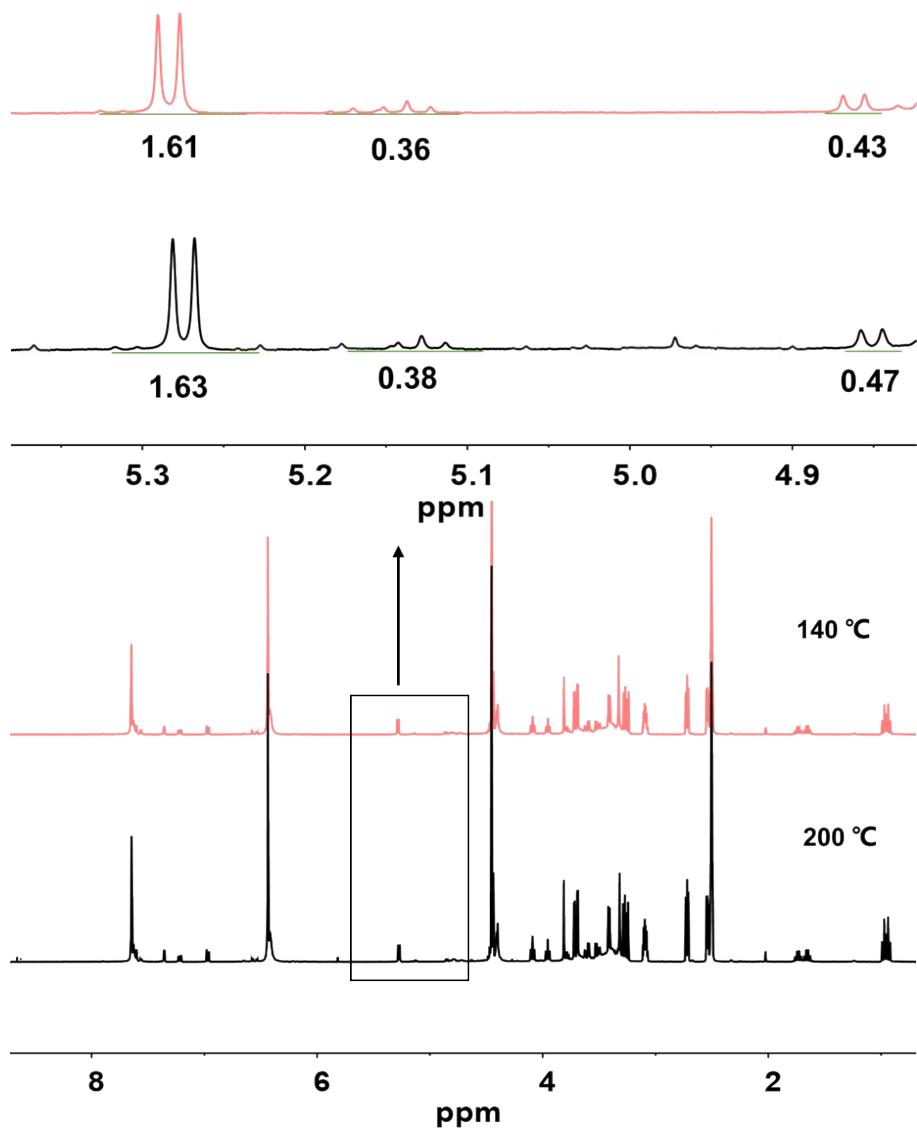

**Fig. S4** <sup>1</sup>H NMR spectra of Diels-Alder adducts at 140 °C for 6 h and at 200 °C for 2 h.

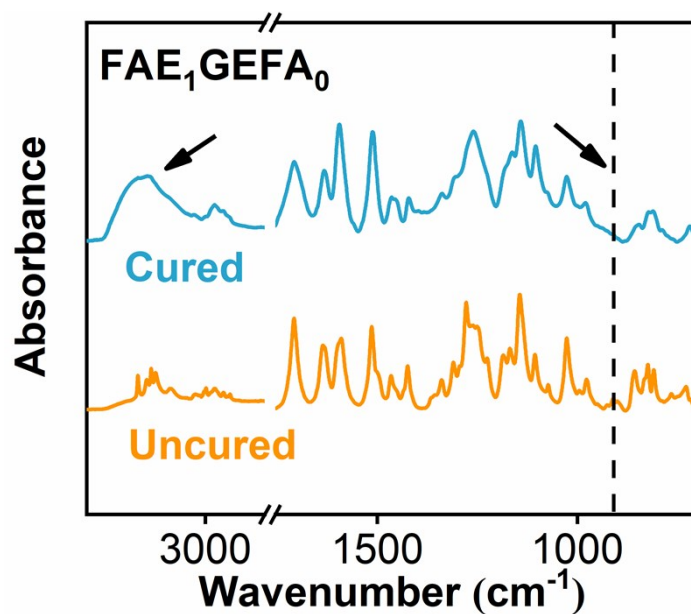

Fig. S5 FTIR spectra of the FAE<sub>1</sub>GEFA<sub>0</sub> system before and after curing.

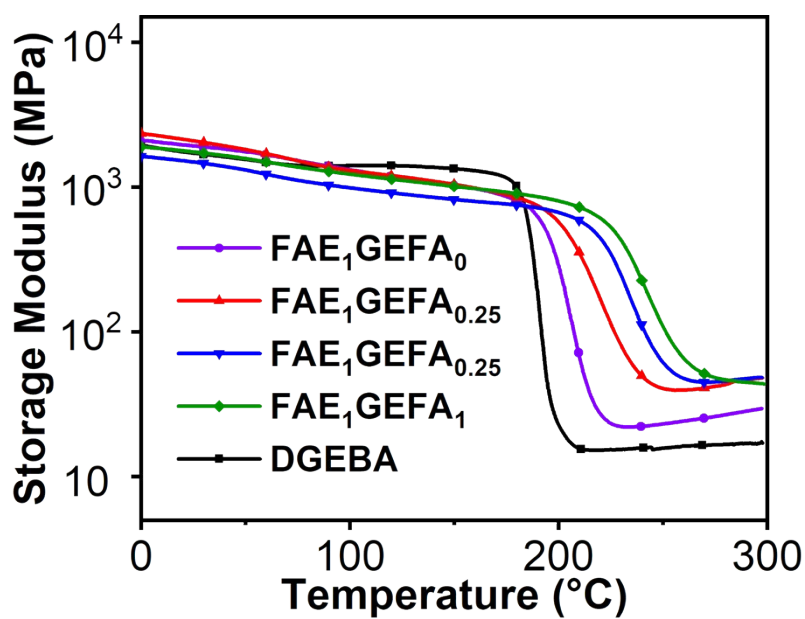

Fig. S6 Storage modulus as a function of temperature for the cured epoxy resins by DMA.
